# Supplementary material for: Hearing Sensitivity, Cardiovascular Risk, and Neurocognitive Function: The Hispanic Community Health Study/Study of Latinos (HCHS/SOL)
Source: PubMed Central journal article supplement (PMC7747041; doi:10.1001/jamaoto.2020.4835), 2020-12-17
Supplement: jamaotolaryngolheadnecksurg-e204835-s001.pdf [file jamaotolaryngolheadnecksurg-e204835-s001.pdf]

## Supplemental Online Content

Stickel AM, Tarraf W, Bainbridge KE, et al. Hearing sensitivity, cardiovascular risk, and neurocognitive function: The Hispanic Community Health Study/Study of Latinos (HCHS/SOL). Published online December 17, 2020. *JAMA Otolaryngol Head Neck Surg*. doi:10.1001/jamaoto.2020.4835

**eMethods 1.** Latent profile analysis

**eTable 1.** Missing data patterns

**eTable 2.** Sociodemographic, socioeconomic, and health characteristics by missing data status

**eTable 3.** Model fit statistics derived from sequential (2-7) latent profile analyses

**eTable 4.** Sociodemographic, socioeconomic, and health characteristics of target population by four group cardiovascular risk classification

**eTable 5.** Estimated odds ratios and 95% confidence intervals of the association between cardiovascular risk classification and hearing impairment

**eTable 6.** Tests for significance of interaction between hearing impairment and cardiovascular risk classification

**eTable 7.** Estimated odds ratios and 95% confidence intervals of the association between cardiovascular risk classification and hearing impairment, among individuals with no history of hearing aid use

**eTable 8.** Associations between hearing impairment, cardiovascular risk classification and cognitive function, among individuals with no history of hearing aid use

**eTable 9.** Tests for modifications in the effects of hearing impairment by cardiovascular risk classification, among individuals with no history of hearing aid use

**eTable 10.** Tests for modifications in the associations between cognition and cardiovascular risk classification by continuous hearing

**eTable 11.** Sociodemographic, socioeconomic, and health characteristics of target population by three group cardiovascular risk classification

**eTable 12.** Estimated odds ratios and 95% confidence intervals of the association between three group cardiovascular risk classification and hearing impairment

**eTable 13.** Associations between hearing impairment, three group cardiovascular risk classification and cognitive function

**eTable 14.** Tests for significance of the modifications in the effects of hearing impairment by three group cardiovascular risk classification

**eFigure 1.** Risk profiles of latent cardiovascular risk classes (3-class solution) derived from the latent profile analyses

**eFigure 2.** Cognitive performance (z-score) by hearing impairment status

**eFigure 3.** Modification in cognitive performance (z-score) by hearing impairment status and cardiovascular risk classification (3-class solution).

## HEARING, CARDIOVASCULAR RISK, AND COGNITION

This supplemental material has been provided by the authors to give readers additional information about their work.

## **eMethods 1. Latent profile analysis**

Latent profile analysis (LPA) is a latent variable mixture modeling technique that identifies clusters, or latent subgroups, of participants in a dataset based on responses to a set of continuous variables. Theoretical and applied discussions of LPAs and their close equivalent for categorical variables are provided elsewhere.<sup>1-3</sup> Advantages of LPA over other clustering techniques, such as K-means clustering or hierarchical clustering, include the use of an explicit model to determine underlying subgroups, and the ability to account for uncertainty in these subgroups. As LPA is a probabilistic model, individuals receive a posterior probability for belonging to each subgroup. Furthermore, as LPA is a mixture modeling technique, the data is assumed to have been sampled from a population composed of a mix of probability distributions (multivariate normal). Classification steps in an analysis pipeline, such as LPA, allow for parsimonious representation of complex structures in a dataset. Individuals can be assigned to a derived subgroup based on their maximum posterior probability. Later analysis steps can then include these conceptually meaningful categories as predictor variables.

Here, we modeled cardiovascular disease risk profiles with LPA through estimates of body mass index (BMI), ankle-brachial Index (ABI), low-density lipoprotein (LDL), triglycerides (log transformed), and high-density lipoproteins (HDL), fasting blood glucose (FBG; log transformed), and Framingham Cardiovascular Risk Score (FCRS), see main text for description of data collection.

We conducted a series of LPAs using maximum likelihood estimation robust to non-normality and non-independence of observations in MPlus 8.3 accounting for the complex survey design structure of the data. We repeated the analysis specifying 2 up to 7 distinct latent profiles and then chose the model with the optimal number of profiles based on the Vuong-Lo-Mendell-Rubin Adjusted Likelihood Ratio Test (VLMR). We also evaluated model fit indices, class size, entropy, and conceptual meaningfulness of each profile to determine the optimal number of profiles to include in the final model. We determined that the four-profile solution provided optimal fit. The VLMR rejected the 5-profile solution over the 4-profile solution,  $p = 0.44$ , entropy of the 4-profile solution was greater than 0.8, and declines in the Akaike and Bayesian Information Criteria attenuated after the 4-profile solution. The 4-class solution was also easier to interpret compared to the others (eTable 3). Participants were assigned to one of these four derived latent CVDR profiles based on the highest membership posterior probability. We interpreted the profiles as Healthy (19.4%), Typical (66.7%), High CVDR (7.4), and Hyperglycemia (6.5%).

HEARING, CARDIOVASCULAR RISK, AND COGNITION

**eTable 1.** Missing data patterns.<sup>a</sup>

|                 |                       | Missing (No, Yes) |            |                |            |           |      |         |              |
|-----------------|-----------------------|-------------------|------------|----------------|------------|-----------|------|---------|--------------|
|                 | Percent Missing       | Unweighted N      | CVDR Class | Marital Status | Background | Education | FCRS | CESD-10 | Hearing Loss |
| <b>Patterns</b> | <b>(Complete) 95%</b> | 9,180             | No         | No             | No         | No        | No   | No      | No           |
|                 | 2%                    | 153               | No         | No             | No         | No        | No   | No      | Yes          |
|                 | <1%                   | 81                | No         | No             | No         | No        | Yes  | No      | No           |
|                 | <1%                   | 78                | No         | No             | No         | No        | No   | Yes     | Yes          |
|                 | <1%                   | 49                | No         | No             | No         | No        | No   | Yes     | No           |
|                 | <1%                   | 14                | No         | No             | No         | Yes       | No   | No      | No           |
|                 | <1%                   | 11                | No         | Yes            | Yes        | Yes       | No   | No      | No           |
|                 | <1%                   | 11                | No         | Yes            | No         | No        | No   | No      | No           |
|                 | <1%                   | 11                | No         | No             | No         | No        | Yes  | Yes     | Yes          |
|                 | <1%                   | 10                | No         | No             | Yes        | No        | No   | No      | No           |
|                 | <1%                   | 7                 | No         | No             | No         | No        | Yes  | No      | Yes          |
|                 | <1%                   | 6                 | No         | No             | No         | No        | Yes  | Yes     | No           |
|                 | <1%                   | 3                 | No         | Yes            | Yes        | Yes       | Yes  | Yes     | Yes          |
|                 | <1%                   | 2                 | Yes        | No             | No         | No        | Yes  | Yes     | Yes          |
|                 | <1%                   | 2                 | No         | Yes            | Yes        | Yes       | No   | Yes     | Yes          |
|                 | <1%                   | 2                 | No         | No             | Yes        | Yes       | No   | No      | No           |
|                 | <1%                   | 1                 | No         | Yes            | Yes        | Yes       | Yes  | No      | Yes          |
|                 | <1%                   | 1                 | No         | Yes            | Yes        | Yes       | No   | Yes     | No           |
| <1%             | 1                     | No                | No         | No             | Yes        | Yes       | Yes  | No      |              |

<sup>a</sup> Abbreviations: CVDR= cardiovascular disease risk; FCRS=Framingham Cardiovascular Risk Score; CESD = Center for Epidemiologic Studies Depression scale.

HEARING, CARDIOVASCULAR RISK, AND COGNITION

**eTable 2.** Sociodemographic, socioeconomic, and health characteristics by missing data status. <sup>a</sup>

|                                   |                          | <b>Complete</b> | <b>Missing on Covariates</b> | <b>Missing on Covariates and Hearing</b> | <b>Total</b> |
|-----------------------------------|--------------------------|-----------------|------------------------------|------------------------------------------|--------------|
| <b>Sex</b>                        |                          |                 |                              |                                          |              |
|                                   | Female                   | 54.49 (0.68)    | 59.91 (5.12)                 | 56.97 (6.64)                             | 54.63 (0.68) |
|                                   | Male                     | 45.51 (0.68)    | 40.09 (5.12)                 | 43.03 (6.64)                             | 45.37 (0.68) |
|                                   | Non-missing Unweighted N | 9623            |                              |                                          |              |
| <b>Education</b>                  |                          |                 |                              |                                          |              |
|                                   | Less than HS             | 39.77 (0.93)    | 43.90 (5.56)                 | 50.61 (7.11)                             | 39.97 (0.91) |
|                                   | HS or Equivalent         | 21.29 (0.71)    | 24.16 (4.52)                 | 16.76 (4.77)                             | 21.28 (0.70) |
|                                   | More than HS             | 38.94 (0.92)    | 31.94 (5.52)                 | 32.63 (6.51)                             | 38.75 (0.90) |
|                                   | Non-missing Unweighted N | 9588            |                              |                                          |              |
| <b>Field Center</b>               |                          |                 |                              |                                          |              |
|                                   | Bronx                    | 25.93 (1.73)    | 39.50 (5.18)                 | 73.96 (6.35)                             | 26.78 (1.73) |
|                                   | Chicago                  | 12.78 (0.87)    | 12.62 (2.35)                 | 8.00 (4.19)                              | 12.72 (0.86) |
|                                   | Miami                    | 36.93 (2.45)    | 31.13 (5.37)                 | 16.51 (5.40)                             | 36.57 (2.41) |
|                                   | San Diego                | 24.36 (1.74)    | 16.75 (3.86)                 | 1.53 (0.85)                              | 23.93 (1.70) |
|                                   | Non-missing Unweighted N | 9623            |                              |                                          |              |
| <b>Hispanic/Latino Background</b> |                          |                 |                              |                                          |              |
|                                   | Dominican                | 9.18 (0.74)     | 9.28 (2.83)                  | 19.32 (5.09)                             | 9.31 (0.74)  |
|                                   | Central                  | 6.57 (0.42)     | 7.00 (2.26)                  | 11.55 (6.56)                             | 6.63 (0.42)  |
|                                   | Cuban                    | 27.59 (2.08)    | 23.46 (5.79)                 | 13.12 (5.20)                             | 27.34 (2.06) |
|                                   | Mexican                  | 31.02 (1.75)    | 24.94 (4.40)                 | 13.15 (4.90)                             | 30.71 (1.71) |
|                                   | Puerto-Rican             | 17.91 (1.03)    | 28.18 (5.01)                 | 27.93 (5.28)                             | 18.20 (1.02) |
|                                   | South American           | 5.44 (0.35)     | 4.26 (2.01)                  | 13.60 (5.01)                             | 5.52 (0.34)  |
|                                   | Other                    | 2.29 (0.30)     | 2.87 (1.84)                  | 1.33 (0.96)                              | 2.29 (0.29)  |
|                                   | Non-missing Unweighted N | 9593            |                              |                                          |              |

<sup>a</sup> Abbreviations: SE = Standard error; SD = Standard deviation; CESD = Center for Epidemiologic Studies Depression scale.

HEARING, CARDIOVASCULAR RISK, AND COGNITION

**eTable 2.** Sociodemographic, socioeconomic, and health characteristics by missing data status (continued).<sup>a</sup>

|                                  |                            | <b>Complete</b> | <b>Missing on Covariates</b> | <b>Missing on Covariates and Hearing</b> | <b>Total</b> |
|----------------------------------|----------------------------|-----------------|------------------------------|------------------------------------------|--------------|
| <b>Income</b>                    |                            |                 |                              |                                          |              |
|                                  | <=\$20000                  | 45.85 (1.11)    | 48.53 (5.25)                 | 55.82 (6.40)                             | 46.02 (1.09) |
|                                  | \$20001-\$50000            | 33.77 (0.82)    | 30.05 (5.14)                 | 26.05 (5.59)                             | 33.60 (0.81) |
|                                  | >=\$50001                  | 10.87 (0.81)    | 6.64 (2.00)                  | 4.13 (1.92)                              | 10.71 (0.79) |
|                                  | Not Reported               | 9.52 (0.49)     | 14.77 (4.26)                 | 14.00 (4.10)                             | 9.67 (0.48)  |
|                                  | Non-missing Unweighted N   | 9623            |                              |                                          |              |
| <b>Marital Status</b>            |                            |                 |                              |                                          |              |
|                                  | Single                     | 16.77 (0.62)    | 23.35 (4.96)                 | 19.55 (6.56)                             | 16.92 (0.62) |
|                                  | Married/Partnered          | 53.17 (1.05)    | 45.83 (5.63)                 | 48.78 (7.43)                             | 52.99 (1.03) |
|                                  | Separated/Divorced/Widowed | 30.06 (0.84)    | 30.82 (4.84)                 | 31.67 (6.36)                             | 30.09 (0.82) |
|                                  | Unweighted N               | 9594            |                              |                                          |              |
| <b>Age</b>                       |                            |                 |                              |                                          |              |
|                                  | Mean                       | 56.45           | 57.29                        | 57.62                                    | 56.48        |
|                                  | SD                         | 9.89            | 10.73                        | 11.13                                    | 9.93         |
|                                  | Non-missing Unweighted N   | 9623.00         |                              |                                          |              |
| <b>CESD-10</b>                   |                            |                 |                              |                                          |              |
|                                  | Mean                       | 7.53            | 8.65                         | 8.01                                     | 7.55         |
|                                  | SD                         | 7.81            | 7.86                         | 3.11                                     | 7.81         |
|                                  | Non-missing Unweighted N   | 9470            |                              |                                          |              |
| <b>Cardiovascular Risk Class</b> |                            |                 |                              |                                          |              |
|                                  | High CVR                   | 7.41 (0.54)     | 5.85 (2.75)                  | 8.47 (3.68)                              | 7.40 (0.53)  |
|                                  | Hyperglycemia              | 6.45 (0.38)     | 2.35 (1.57)                  | 3.97 (1.57)                              | 6.34 (0.37)  |
|                                  | Healthy                    | 19.40 (0.64)    | 15.17 (4.47)                 | 22.21 (4.83)                             | 19.36 (0.63) |
|                                  | Typical                    | 66.73 (0.72)    | 76.64 (5.03)                 | 65.36 (6.55)                             | 66.90 (0.71) |

HEARING, CARDIOVASCULAR RISK, AND COGNITION

|                                                                                                                                     |                          |      |  |  |  |
|-------------------------------------------------------------------------------------------------------------------------------------|--------------------------|------|--|--|--|
|                                                                                                                                     | Non-missing Unweighted N | 9621 |  |  |  |
| <sup>a</sup> Abbreviations: SE = Standard error; SD = Standard deviation; CESD = Center for Epidemiologic Studies Depression scale. |                          |      |  |  |  |

HEARING, CARDIOVASCULAR RISK, AND COGNITION

**eTable 3.** Model fit statistics derived from sequential (2-7) latent profile analyses.<sup>a</sup>

| <b>Classes</b> | <b>Parameters</b> | <b>AIC</b> | <b>BIC</b> | <b>aBIC</b> | <b>AICC</b> | <b>Entropy</b> | <b>Lo-Mendell-Rubin Adjusted LRT</b> |
|----------------|-------------------|------------|------------|-------------|-------------|----------------|--------------------------------------|
| 2              | 22                | 219882.894 | 220040.87  | 219970.957  | 219882.999  | 0.967          | <0.0001                              |
| 3              | 30                | 216563.434 | 216778.855 | 216683.52   | 216563.626  | 0.938          | <0.0001                              |
| 4              | 38                | 214257.711 | 214530.578 | 214409.82   | 214258.018  | 0.806          | <0.0001                              |
| 5              | 46                | 212433.15  | 212763.462 | 212617.281  | 212433.598  | 0.834          | 0.45                                 |
| 6              | 54                | 211465.612 | 211853.37  | 211681.766  | 211466.227  | 0.837          | 0.70                                 |
| 7              | 62                | 209836.83  | 210282.033 | 210085.007  | 209837.64   | 0.849          | 0.50                                 |

<sup>a</sup> Abbreviations: AIC = Akaike information criterion; BIC = Bayesian information Criterion; aBIC = Sample size adjusted BIC, AICC = Sample corrected AIC; LRT=Likelihood ratio test.



HEARING, CARDIOVASCULAR RISK, AND COGNITION

**eTable 4.** Sociodemographic, socioeconomic, and health characteristics of target population by four group cardiovascular risk classification.<sup>a</sup>

|                   |                | Cardiovascular Risk Groups |               |              |              |              |
|-------------------|----------------|----------------------------|---------------|--------------|--------------|--------------|
|                   |                | High CVDR                  | Hyperglycemia | Healthy      | Typical      | Total        |
|                   |                | %(SE)                      | %(SE)         | %(SE)        | %(SE)        | %(SE)        |
| <b>Sex</b>        |                |                            |               |              |              |              |
|                   | Female         | 21.16 (2.84)               | 49.05 (2.73)  | 73.31 (1.53) | 53.19 (0.84) | 54.43 (0.70) |
| <b>Education</b>  |                |                            |               |              |              |              |
|                   | <12            | 46.77 (3.27)               | 47.50 (3.02)  | 34.66 (1.75) | 39.74 (1.08) | 39.79 (0.94) |
|                   | 12             | 16.56 (2.00)               | 21.80 (2.39)  | 21.17 (1.33) | 21.68 (0.94) | 21.21 (0.72) |
|                   | >12            | 36.67 (3.02)               | 30.70 (2.78)  | 44.17 (1.77) | 38.58 (1.08) | 39.01 (0.93) |
| <b>Center</b>     |                |                            |               |              |              |              |
|                   | Bronx          | 22.46 (3.31)               | 25.33 (2.66)  | 26.38 (2.09) | 25.31 (1.85) | 25.31 (1.72) |
|                   | Chicago        | 7.33 (1.40)                | 14.81 (1.84)  | 11.21 (0.95) | 13.93 (1.02) | 12.97 (0.89) |
|                   | Miami          | 53.57 (4.71)               | 30.81 (3.58)  | 35.04 (2.79) | 36.26 (2.41) | 36.97 (2.46) |
|                   | San Diego      | 16.63 (3.10)               | 29.06 (3.56)  | 27.36 (2.14) | 24.50 (1.87) | 24.76 (1.77) |
| <b>Background</b> |                |                            |               |              |              |              |
|                   | Dominican      | 6.35 (1.46)                | 7.66 (1.49)   | 10.17 (0.99) | 9.04 (0.79)  | 8.97 (0.72)  |
|                   | Central        | 6.05 (1.33)                | 7.81 (1.29)   | 5.96 (0.61)  | 6.71 (0.50)  | 6.59 (0.43)  |
|                   | Cuban          | 44.12 (4.32)               | 21.72 (3.24)  | 24.64 (2.32) | 27.22 (2.06) | 27.63 (2.09) |
|                   | Mexican        | 19.16 (3.20)               | 38.65 (3.51)  | 32.29 (2.09) | 31.98 (1.85) | 31.51 (1.77) |
|                   | Puerto-Rican   | 18.04 (2.51)               | 19.65 (2.23)  | 18.31 (1.87) | 17.19 (1.05) | 17.63 (1.02) |
|                   | South American | 3.23 (0.77)                | 3.51 (0.89)   | 6.42 (0.80)  | 5.61 (0.40)  | 5.45 (0.35)  |
|                   | Other          | 3.05 (0.95)                | 1.00 (0.52)   | 2.21 (0.50)  | 2.25 (0.42)  | 2.22 (0.30)  |

<sup>a</sup> Abbreviations: SE = Standard error; SD = Standard deviation; CESD = Center for Epidemiologic Studies Depression scale; BMI = Body mass index; ABI = Ankle-brachial index; HDL = High-density lipoproteins; LDL = Low-density lipoproteins; FCRS = Framingham Cardiovascular Risk Score

HEARING, CARDIOVASCULAR RISK, AND COGNITION

**eTable 4.** Sociodemographic, socioeconomic, and health characteristics of target population by four group cardiovascular risk classification (continued).<sup>a</sup>

|                              |                   | Cardiovascular Risk Groups |                  |                  |                  |                  |
|------------------------------|-------------------|----------------------------|------------------|------------------|------------------|------------------|
|                              |                   | High CVDR                  | Hyperglycemia    | Healthy          | Typical          | Total            |
|                              |                   | %(SE)                      | %(SE)            | %(SE)            | %(SE)            | %(SE)            |
| <b>Income</b>                |                   |                            |                  |                  |                  |                  |
|                              | <=\$20000         | 55.35 (3.16)               | 53.10 (2.97)     | 44.19 (1.98)     | 44.22 (1.18)     | 45.62 (1.12)     |
|                              | \$20001-\$50000   | 27.63 (2.59)               | 30.79 (2.77)     | 32.31 (1.66)     | 35.29 (1.02)     | 33.85 (0.82)     |
|                              | >=\$50001         | 6.09 (1.59)                | 7.05 (1.39)      | 13.12 (1.43)     | 11.25 (0.94)     | 10.95 (0.83)     |
|                              | Not Reported      | 10.93 (1.97)               | 9.06 (1.41)      | 10.38 (1.04)     | 9.25 (0.62)      | 9.58 (0.49)      |
| <b>Marital Status</b>        |                   |                            |                  |                  |                  |                  |
|                              | Single            | 15.78 (2.33)               | 17.45 (1.94)     | 17.54 (1.19)     | 16.42 (0.72)     | 16.65 (0.63)     |
|                              | Married/Partnered | 52.17 (3.16)               | 54.04 (2.74)     | 47.66 (1.94)     | 55.15 (1.27)     | 53.41 (1.07)     |
|                              | Other             | 32.06 (2.87)               | 28.51 (2.48)     | 34.79 (1.74)     | 28.43 (1.02)     | 29.94 (0.85)     |
|                              |                   | <b>Mean (SD)</b>           | <b>Mean (SD)</b> | <b>Mean (SD)</b> | <b>Mean (SD)</b> | <b>Mean (SD)</b> |
| <b>Age</b>                   |                   | 65.21 (6.17)               | 56.35 (9.70)     | 55.24 (9.79)     | 55.87 (9.64)     | 56.48 (9.90)     |
| <b>CESD-10</b>               |                   | 7.22 (6.07)                | 8.49 (8.27)      | 7.34 (8.13)      | 7.47 (7.81)      | 7.49 (7.78)      |
| <b>BMI</b>                   |                   | 29.99 (4.93)               | 31.18 (7.65)     | 27.00 (6.15)     | 30.53 (6.66)     | 29.84 (6.73)     |
| <b>ABI</b>                   |                   | 1.02 (0.18)                | 1.09 (0.23)      | 1.05 (0.15)      | 1.06 (0.15)      | 1.06 (0.16)      |
| <b>HDL</b>                   |                   | 40.53 (10.28)              | 45.04 (14.24)    | 68.02 (15.17)    | 45.72 (10.83)    | 49.61 (16.33)    |
| <b>LDL</b>                   |                   | 134.83 (40.85)             | 125.56 (55.35)   | 120.37 (41.77)   | 131.87 (46.60)   | 129.42 (46.37)   |
| <b>Triglycerides</b>         |                   | 211.15 (170.38)            | 224.96 (466.43)  | 81.84 (35.47)    | 157.98 (105.30)  | 151.52 (162.43)  |
| <b>Fasting Blood Glucose</b> |                   | 120.65 (27.23)             | 239.48 (80.24)   | 94.93 (14.02)    | 101.25 (17.63)   | 110.39 (49.73)   |
| <b>FCRS</b>                  |                   | 5.05 (1.30)                | 2.61 (1.76)      | 0.80 (0.77)      | 1.41 (1.05)      | 1.64 (1.69)      |

<sup>a</sup> Abbreviations: SE = Standard error; SD = Standard deviation; CESD = Center for Epidemiologic Studies Depression scale; BMI = Body mass index; ABI = Ankle-brachial index; HDL = High-density lipoproteins; LDL = Low-density lipoproteins; FCRS = Framingham Cardiovascular Risk Score

HEARING, CARDIOVASCULAR RISK, AND COGNITION

| <b>eTable 5.</b> Estimated odds ratios and 95% confidence intervals of the association between cardiovascular risk classification and hearing impairment. <sup>a</sup> |               |                               |
|------------------------------------------------------------------------------------------------------------------------------------------------------------------------|---------------|-------------------------------|
|                                                                                                                                                                        |               | <b>Hearing Loss &gt;25 dB</b> |
|                                                                                                                                                                        |               | <b>OR [95%CI]</b>             |
| <b>Cardiovascular Risk Groups</b>                                                                                                                                      |               |                               |
|                                                                                                                                                                        | High CVDR     | 1.48 [1.02,2.13]              |
|                                                                                                                                                                        | Hyperglycemia | 1.64 [1.16,2.33]              |
|                                                                                                                                                                        | Healthy       | ref                           |
|                                                                                                                                                                        | Typical       | 1.18 [0.95,1.48]              |
| <b>Age (in years)</b>                                                                                                                                                  |               | 1.10 [1.09,1.12]              |
| <b>Sex</b>                                                                                                                                                             |               |                               |
|                                                                                                                                                                        | Male          | 2.11 [1.73,2.59]              |
| <b>Education (in years)</b>                                                                                                                                            |               |                               |
|                                                                                                                                                                        | <12           | ref                           |
|                                                                                                                                                                        | 12            | 0.73 [0.58,0.91]              |
|                                                                                                                                                                        | >12           | 0.59 [0.48,0.73]              |
| <b>Center</b>                                                                                                                                                          |               |                               |
|                                                                                                                                                                        | Bronx         | ref                           |
|                                                                                                                                                                        | Chicago       | 0.95 [0.74,1.21]              |
|                                                                                                                                                                        | Miami         | 1.04 [0.83,1.30]              |
|                                                                                                                                                                        | San Diego     | 0.98 [0.76,1.27]              |
| <b>Intercept</b>                                                                                                                                                       |               | 0.00 [0.00, 0.00]             |
| <sup>a</sup> Abbreviations: OR = Odds ratio; CI = Confidence interval; CVDR = Cardiovascular risk; dB = Decibels                                                       |               |                               |

HEARING, CARDIOVASCULAR RISK, AND COGNITION

| <b>eTable 6.</b> Tests for significance of interaction between hearing impairment and cardiovascular risk classification. <sup>a</sup> |          |           |
|----------------------------------------------------------------------------------------------------------------------------------------|----------|-----------|
| <b>Cognitive Test</b>                                                                                                                  | <b>F</b> | <b>df</b> |
| B-SEVLT-Sum                                                                                                                            | 3.697    | 3         |
| B-SEVLT-Recall                                                                                                                         | 2.918    | 3         |
| Word Fluency                                                                                                                           | 0.420    | 3         |
| Digit Symbol Substitution                                                                                                              | 1.867    | 3         |
| Global Cognition                                                                                                                       | 2.137    | 3         |

<sup>a</sup> Abbreviations: B-SEVLT = Brief–Spanish English Verbal Learning Test; df = Degree of freedom

HEARING, CARDIOVASCULAR RISK, AND COGNITION

**eTable 7.** Estimated odds ratios and 95% confidence intervals of the association between cardiovascular risk classification and hearing impairment, among individuals with no history of hearing aid use.<sup>a</sup>

|                                   |               | Hearing Loss >25 dB |
|-----------------------------------|---------------|---------------------|
|                                   |               | OR [95%CI]          |
| <b>Cardiovascular Risk Groups</b> |               |                     |
|                                   | High CVDR     | 1.55 [1.06,2.28]    |
|                                   | Hyperglycemia | 1.72 [1.20,2.47]    |
|                                   | Healthy       | ref                 |
|                                   | Typical       | 1.19 [0.94,1.50]    |
| <b>Age</b>                        |               | 1.10 [1.09,1.11]    |
| <b>Sex</b>                        |               |                     |
|                                   | Male          | 2.13 [1.73,2.63]    |
| <b>Education</b>                  |               |                     |
|                                   | <12           | ref                 |
|                                   | 12            | 0.70 [0.56,0.89]    |
|                                   | >12           | 0.57 [0.45,0.71]    |
| <b>Center</b>                     |               |                     |
|                                   | Bronx         | ref                 |
|                                   | Chicago       | 0.96 [0.74,1.23]    |
|                                   | Miami         | 1.08 [0.85,1.36]    |
|                                   | San Diego     | 1.00 [0.76,1.30]    |

<sup>a</sup> Abbreviations: OR = Odds ratio; CI = Confidence Interval; CVDR = Cardiovascular risk; dB = decibels

HEARING, CARDIOVASCULAR RISK, AND COGNITION

**eTable 8.** Associations between hearing impairment, cardiovascular risk classification and cognitive function, among individuals with no history of hearing aid use.<sup>a, b</sup>

|                       | M1                  | M2                  | M3                  | M4                  |
|-----------------------|---------------------|---------------------|---------------------|---------------------|
|                       | B [95% CI]          | B [95% CI]          | B [95% CI]          | B [95% CI]          |
| <b>B-SEVLT-Sum</b>    |                     |                     |                     |                     |
| High CVDR             | -0.20 [-0.31;-0.09] | n/a                 | -0.18 [-0.29;-0.07] | -0.15 [-0.25;-0.05] |
| Hyperglycemia         | -0.09 [-0.19;-0.00] | n/a                 | -0.08 [-0.17;0.01]  | -0.04 [-0.13;0.04]  |
| Healthy               | 0.00 [0.00;0.00]    | n/a                 | ref                 | ref                 |
| Typical               | -0.05 [-0.10;0.01]  | n/a                 | -0.04 [-0.10;0.02]  | -0.04 [-0.09;0.02]  |
| ≤25 dB (Normal)       | n/a                 | ref                 | ref                 | ref                 |
| >25 dB (Mild or more) | n/a                 | -0.15 [-0.22;-0.08] | -0.14 [-0.21;-0.07] | -0.11 [-0.18;-0.05] |
| Intercept             | 1.09 [0.91;1.27]    | 1.06 [0.88;1.23]    | 1.01 [0.83;1.20]    | 1.09 [0.91;1.27]    |
| <b>B-SEVLT-Recall</b> |                     |                     |                     |                     |
| High CVDR             | -0.18 [-0.29;-0.07] | n/a                 | -0.17 [-0.28;-0.06] | -0.14 [-0.25;-0.04] |
| Hyperglycemia         | -0.03 [-0.12;0.05]  | n/a                 | -0.02 [-0.11;0.06]  | 0.00 [-0.08;0.09]   |
| Healthy               | 0.00 [0.00;0.00]    | n/a                 | ref                 | ref                 |
| Typical               | -0.06 [-0.11;-0.00] | n/a                 | -0.06 [-0.11;-0.00] | -0.06 [-0.11;-0.00] |
| ≤25 dB (Normal)       | n/a                 | ref                 | ref                 | ref                 |
| >25 dB (Mild or more) | n/a                 | -0.10 [-0.16;-0.04] | -0.10 [-0.16;-0.03] | -0.07 [-0.13;-0.00] |
| Intercept             | 1.03 [0.85;1.20]    | 1.02 [0.84;1.19]    | 0.99 [0.81;1.16]    | 1.00 [0.81;1.18]    |
| <b>Word Fluency</b>   |                     |                     |                     |                     |
| High CVDR             | -0.25 [-0.37;-0.13] | n/a                 | -0.24 [-0.36;-0.11] | -0.21 [-0.34;-0.09] |
| Hyperglycemia         | -0.16 [-0.27;-0.05] | n/a                 | -0.15 [-0.26;-0.04] | -0.12 [-0.23;-0.01] |
| Healthy               | 0.00 [0.00;0.00]    | n/a                 | ref                 | ref                 |
| Typical               | -0.11 [-0.18;-0.04] | n/a                 | -0.11 [-0.18;-0.03] | -0.10 [-0.17;-0.03] |
| ≤25 dB (Normal)       | n/a                 | ref                 | ref                 | ref                 |
| >25 dB (Mild or more) | n/a                 | -0.13 [-0.20;-0.07] | -0.13 [-0.19;-0.06] | -0.10 [-0.17;-0.04] |
| Intercept             | -0.16 [-0.39;0.06]  | -0.24 [-0.45;-0.03] | -0.24 [-0.46;-0.01] | -0.34 [-0.56;-0.12] |

HEARING, CARDIOVASCULAR RISK, AND COGNITION

| <b>Digit Symbol Substitution</b>                                                                                                                                                                                                                                                                |                       |                     |                     |                     |                     |
|-------------------------------------------------------------------------------------------------------------------------------------------------------------------------------------------------------------------------------------------------------------------------------------------------|-----------------------|---------------------|---------------------|---------------------|---------------------|
|                                                                                                                                                                                                                                                                                                 | High CVDR             | -0.11 [-0.21;-0.02] | n/a                 | -0.11 [-0.21;-0.01] | -0.08 [-0.17;0.02]  |
|                                                                                                                                                                                                                                                                                                 | Hyperglycemia         | -0.12 [-0.21;-0.03] | n/a                 | -0.12 [-0.21;-0.03] | -0.08 [-0.17;0.00]  |
|                                                                                                                                                                                                                                                                                                 | Healthy               | 0.00 [0.00;0.00]    | n/a                 | 0.00 [0.00;0.00]    | 0.00 [0.00;0.00]    |
|                                                                                                                                                                                                                                                                                                 | Typical               | -0.08 [-0.13;-0.02] | n/a                 | -0.08 [-0.13;-0.02] | -0.07 [-0.12;-0.02] |
|                                                                                                                                                                                                                                                                                                 | ≤25 dB (Normal)       | n/a                 | 0.00 [0.00;0.00]    | 0.00 [0.00;0.00]    | 0.00 [0.00;0.00]    |
|                                                                                                                                                                                                                                                                                                 | >25 dB (Mild or more) | n/a                 | -0.06 [-0.12;-0.00] | -0.06 [-0.12;0.00]  | -0.04 [-0.09;0.02]  |
|                                                                                                                                                                                                                                                                                                 | Intercept             | 1.34 [1.14;1.53]    | 1.27 [1.09;1.45]    | 1.30 [1.10;1.49]    | 1.06 [0.89;1.24]    |
| <b>Global Cognition</b>                                                                                                                                                                                                                                                                         |                       |                     |                     |                     |                     |
|                                                                                                                                                                                                                                                                                                 | High CVDR             | -0.19 [-0.27;-0.11] | n/a                 | -0.18 [-0.26;-0.10] | -0.15 [-0.22;-0.07] |
|                                                                                                                                                                                                                                                                                                 | Hyperglycemia         | -0.10 [-0.17;-0.03] | n/a                 | -0.09 [-0.16;-0.02] | -0.06 [-0.13;0.01]  |
|                                                                                                                                                                                                                                                                                                 | Healthy               | 0.00 [0.00;0.00]    | n/a                 | ref                 | ref                 |
|                                                                                                                                                                                                                                                                                                 | Typical               | -0.07 [-0.11;-0.03] | n/a                 | -0.07 [-0.11;-0.03] | -0.06 [-0.10;-0.03] |
|                                                                                                                                                                                                                                                                                                 | ≤25 dB (Normal)       | n/a                 | ref                 | ref                 | ref                 |
|                                                                                                                                                                                                                                                                                                 | >25 dB (Mild or more) | n/a                 | -0.11 [-0.16;-0.07] | -0.11 [-0.15;-0.06] | -0.08 [-0.13;-0.04] |
|                                                                                                                                                                                                                                                                                                 | Intercept             | 0.83 [0.69;0.97]    | 0.79 [0.65;0.92]    | 0.77 [0.63;0.91]    | 0.71 [0.59;0.84]    |
| <sup>a</sup> Abbreviations: B = Unstandardized coefficient estimate; CI = Confidence interval; ref = Reference category; n/a = not applicable; B-SEVLT = Brief-Spanish English Verbal Learning Test; dB = decibels; CVDR = Cardiovascular disease risk                                          |                       |                     |                     |                     |                     |
| <sup>b</sup> All cognitive tests are normalized, and associations should be interpreted in z-score units. M1, M2, and M3 are age, sex, education, and Field Center adjusted. M4 includes additional adjustment for Hispanic/Latino background, income, marital status, and depressive symptoms. |                       |                     |                     |                     |                     |

HEARING, CARDIOVASCULAR RISK, AND COGNITION

**eTable 9.** Tests for modifications in the effects of hearing impairment by cardiovascular risk classification, among individuals with no history of hearing aid use.<sup>a</sup>

| <b>Cognitive Test</b>     | <b>F</b> | <b>df</b> |
|---------------------------|----------|-----------|
| B-SEVLT-Sum               | 4.086    | 3         |
| B-SEVLT-Recall            | 2.941    | 3         |
| Word Fluency              | 0.500    | 3         |
| Digit Symbol Substitution | 1.844    | 3         |
| Global Cognition          | 2.204    | 3         |

<sup>a</sup> Abbreviations: B-SEVLT = Brief–Spanish English Verbal Learning Test; df = Degree of freedom



HEARING, CARDIOVASCULAR RISK, AND COGNITION

**eTable 10.** Tests for modifications in the associations between cognition and cardiovascular risk classification by continuous hearing.<sup>a</sup>

| <b>Cognitive Test</b>     | <b>F</b> | <b>df</b> |
|---------------------------|----------|-----------|
| B-SEVLT-Sum               | 2.681    | 3         |
| B-SEVLT-Recall            | 3.481    | 3         |
| Word Fluency              | 0.152    | 3         |
| Digit Symbol Substitution | 0.503    | 3         |
| Global Cognition          | 1.709    | 3         |

<sup>a</sup> Abbreviations: B-SEVLT = Brief–Spanish English Verbal Learning Test; df = Degree of freedom

HEARING, CARDIOVASCULAR RISK, AND COGNITION

**Table 11.** Sociodemographic, socioeconomic, and health characteristics of target population by three group cardiovascular risk classification.<sup>a</sup>

|                   |                | Cardiovascular Risk Groups |              |               |              |
|-------------------|----------------|----------------------------|--------------|---------------|--------------|
|                   |                | Typical                    | High CVDR    | Hyperglycemia | Total        |
|                   |                | %(SE)                      | %(SE)        | %(SE)         | %(SE)        |
| <b>Sex</b>        |                |                            |              |               |              |
|                   | Female         | 57.94 (0.73)               | 22.76 (2.69) | 49.64 (2.77)  | 54.43 (0.70) |
| <b>Education</b>  |                |                            |              |               |              |
|                   | <12            | 38.50 (0.97)               | 46.26 (3.19) | 48.13 (3.04)  | 39.79 (0.94) |
|                   | 12             | 21.61 (0.81)               | 16.84 (1.94) | 21.63 (2.38)  | 21.21 (0.72) |
|                   | >12            | 39.89 (0.98)               | 36.91 (2.96) | 30.25 (2.76)  | 39.01 (0.93) |
| <b>Center</b>     |                |                            |              |               |              |
|                   | Bronx          | 25.56 (1.72)               | 22.65 (3.08) | 25.42 (2.67)  | 25.31 (1.72) |
|                   | Chicago        | 13.40 (0.93)               | 7.41 (1.27)  | 14.52 (1.82)  | 12.97 (0.89) |
|                   | Miami          | 35.83 (2.34)               | 53.56 (4.43) | 30.27 (3.60)  | 36.97 (2.46) |
|                   | San Diego      | 25.21 (1.79)               | 16.38 (2.80) | 29.79 (3.56)  | 24.76 (1.77) |
| <b>Background</b> |                |                            |              |               |              |
|                   | Dominican      | 9.31 (0.74)                | 6.35 (1.36)  | 7.90 (1.52)   | 8.97 (0.72)  |
|                   | Central        | 6.56 (0.44)                | 5.96 (1.24)  | 7.80 (1.29)   | 6.59 (0.43)  |
|                   | Cuban          | 26.45 (1.97)               | 44.50 (4.11) | 21.15 (3.27)  | 27.63 (2.09) |
|                   | Mexican        | 32.17 (1.77)               | 18.99 (2.91) | 39.18 (3.52)  | 31.51 (1.77) |
|                   | Puerto-Rican   | 17.43 (1.03)               | 18.23 (2.33) | 19.49 (2.22)  | 17.63 (1.02) |
|                   | South American | 5.85 (0.39)                | 2.98 (0.69)  | 3.48 (0.88)   | 5.45 (0.35)  |
|                   | Other          | 2.24 (0.35)                | 3.00 (0.85)  | 0.99 (0.52)   | 2.22 (0.30)  |

<sup>a</sup> Abbreviations: SE = Standard error; SD = Standard deviation; CESD = Center for Epidemiologic Studies Depression scale; BMI = Body mass index; ABI = Ankle-brachial index; HDL = High-density lipoproteins; LDL = Low-density lipoproteins; FCRS = Framingham Cardiovascular Risk Score

HEARING, CARDIOVASCULAR RISK, AND COGNITION

**eTable 11.** Sociodemographic, socioeconomic, and health characteristics of target population by three group cardiovascular risk classification (continued).<sup>a</sup>

|                              |                   | Cardiovascular Risk Groups |                  |                  |                  |
|------------------------------|-------------------|----------------------------|------------------|------------------|------------------|
|                              |                   | Typical                    | High CVDR        | Hyperglycemia    | Total            |
|                              |                   | %(SE)                      | %(SE)            | %(SE)            | %(SE)            |
| <b>Income</b>                |                   |                            |                  |                  |                  |
|                              | <=\$20000         | 44.04 (1.16)               | 55.64 (2.89)     | 53.17 (2.96)     | 45.62 (1.12)     |
|                              | \$20001-\$50000   | 34.78 (0.92)               | 26.82 (2.34)     | 30.89 (2.74)     | 33.85 (0.82)     |
|                              | >=\$50001         | 11.78 (0.90)               | 5.70 (1.42)      | 6.95 (1.38)      | 10.95 (0.83)     |
|                              | Not Reported      | 9.40 (0.56)                | 11.84 (1.91)     | 8.99 (1.40)      | 9.58 (0.49)      |
| <b>Marital Status</b>        |                   |                            |                  |                  |                  |
|                              | Single            | 16.73 (0.65)               | 15.32 (2.13)     | 17.41 (1.94)     | 16.65 (0.63)     |
|                              | Married/Partnered | 53.42 (1.18)               | 52.88 (2.92)     | 53.91 (2.76)     | 53.41 (1.07)     |
|                              | Other             | 29.85 (0.95)               | 31.80 (2.67)     | 28.68 (2.47)     | 29.94 (0.85)     |
|                              |                   | <b>Mean (SD)</b>           | <b>Mean (SD)</b> | <b>Mean (SD)</b> | <b>Mean (SD)</b> |
| <b>Age</b>                   |                   | 55.66 (9.67)               | 64.93 (6.32)     | 56.26 (9.61)     | 56.48 (9.90)     |
| <b>CESD-10</b>               |                   | 7.44 (7.89)                | 7.30 (6.26)      | 8.43 (8.17)      | 7.49 (7.78)      |
| <b>BMI</b>                   |                   | 29.72 (6.81)               | 30.18 (5.19)     | 31.11 (7.54)     | 29.84 (6.73)     |
| <b>ABI</b>                   |                   | 1.06 (0.15)                | 1.02 (0.18)      | 1.09 (0.23)      | 1.06 (0.16)      |
| <b>HDL</b>                   |                   | 50.86 (16.55)              | 40.69 (10.38)    | 44.95 (14.14)    | 49.61 (16.33)    |
| <b>LDL</b>                   |                   | 129.19 (45.84)             | 135.15 (42.08)   | 125.17 (55.72)   | 129.42 (46.37)   |
| <b>Triglycerides</b>         |                   | 139.58 (99.57)             | 214.15 (173.76)  | 226.16 (463.81)  | 151.52 (162.43)  |
| <b>Fasting Blood Glucose</b> |                   | 99.63 (16.97)              | 119.66 (26.82)   | 238.33 (80.12)   | 110.39 (49.73)   |
| <b>FCRS</b>                  |                   | 1.25 (1.01)                | 4.86 (1.36)      | 2.59 (1.76)      | 1.64 (1.69)      |

<sup>a</sup> Abbreviations: SE = Standard error; SD = Standard deviation; CESD = Center for Epidemiologic Studies Depression scale; BMI = Body mass index; ABI = Ankle-brachial index; HDL = High-density lipoproteins; LDL = Low-density lipoproteins; FCRS = Framingham Cardiovascular Risk Score

HEARING, CARDIOVASCULAR RISK, AND COGNITION

| <b>eTable 12.</b> Estimated odds ratios and 95% confidence intervals of the association between three group cardiovascular risk classification and hearing impairment. <sup>a</sup> |               |                               |
|-------------------------------------------------------------------------------------------------------------------------------------------------------------------------------------|---------------|-------------------------------|
|                                                                                                                                                                                     |               | <b>Hearing Loss &gt;25 dB</b> |
|                                                                                                                                                                                     |               | <b>OR [95%CI]</b>             |
| <b>Cardiovascular Risk Groups</b>                                                                                                                                                   |               |                               |
|                                                                                                                                                                                     | Typical       | ref                           |
|                                                                                                                                                                                     | High CVDR     | 1.38 [1.02,1.87]              |
|                                                                                                                                                                                     | Hyperglycemia | 1.39 [1.03,1.88]              |
| <b>Age</b>                                                                                                                                                                          |               | 1.10 [1.09,1.11]              |
| <b>Sex</b>                                                                                                                                                                          |               |                               |
|                                                                                                                                                                                     | Male          | 2.12 [1.73,2.59]              |
| <b>Education</b>                                                                                                                                                                    |               |                               |
|                                                                                                                                                                                     | <12           | ref                           |
|                                                                                                                                                                                     | 12            | 0.73 [0.58,0.91]              |
|                                                                                                                                                                                     | >12           | 0.59 [0.47,0.73]              |
| <b>Center</b>                                                                                                                                                                       |               |                               |
|                                                                                                                                                                                     | Bronx         | ref                           |
|                                                                                                                                                                                     | Chicago       | 0.96 [0.75,1.22]              |
|                                                                                                                                                                                     | Miami         | 1.04 [0.83,1.30]              |
|                                                                                                                                                                                     | San Diego     | 0.99 [0.77,1.27]              |
| <sup>a</sup> Abbreviations: OR = Odds ratio; CI = Confidence Interval; CVDR = Cardiovascular risk; dB = decibels                                                                    |               |                               |

HEARING, CARDIOVASCULAR RISK, AND COGNITION

**eTable 13.** Associations between hearing impairment, three group cardiovascular risk classification and cognitive function.<sup>a, b</sup>

|                                  | M1                  | M2                  | M3                  | M4                  |
|----------------------------------|---------------------|---------------------|---------------------|---------------------|
|                                  | B [95% CI]          | B [95% CI]          | B [95% CI]          | B [95% CI]          |
| <b>B-SEVLT-Sum</b>               |                     |                     |                     |                     |
| Typical                          | ref                 | n/a                 | ref                 | ref                 |
| High CVDR                        | -0.16 [-0.24;-0.07] | n/a                 | -0.15 [-0.23;-0.06] | -0.12 [-0.20;-0.04] |
| Hyperglycemia                    | -0.06 [-0.15;0.02]  | n/a                 | -0.05 [-0.14;0.03]  | -0.02 [-0.11;0.06]  |
| ≤25 dB (Normal)                  | n/a                 | ref                 | ref                 | ref                 |
| >25 dB (Mild or more)            | n/a                 | -0.15 [-0.22;-0.09] | -0.14 [-0.21;-0.08] | -0.12 [-0.18;-0.05] |
| Intercept                        | 1.05 [0.87;1.22]    | 1.04 [0.86;1.22]    | 0.97 [0.79;1.15]    | 1.05 [0.87;1.23]    |
| <b>B-SEVLT-Recall</b>            |                     |                     |                     |                     |
| Typical                          | ref                 | n/a                 | ref                 | ref                 |
| High CVDR                        | -0.14 [-0.22;-0.05] | n/a                 | -0.13 [-0.22;-0.04] | -0.10 [-0.19;-0.02] |
| Hyperglycemia                    | 0.01 [-0.06;0.09]   | n/a                 | 0.02 [-0.06;0.10]   | 0.05 [-0.03;0.13]   |
| ≤25 dB (Normal)                  | n/a                 | ref                 | ref                 | ref                 |
| >25 dB (Mild or more)            | n/a                 | -0.10 [-0.16;-0.04] | -0.10 [-0.16;-0.03] | -0.07 [-0.13;-0.00] |
| Intercept                        | 0.98 [0.81;1.16]    | 1.01 [0.84;1.19]    | 0.94 [0.77;1.12]    | 0.96 [0.78;1.15]    |
| <b>Word Fluency</b>              |                     |                     |                     |                     |
| Typical                          | ref                 | n/a                 | ref                 | ref                 |
| High CVDR                        | -0.13 [-0.23;-0.04] | n/a                 | -0.13 [-0.23;-0.03] | -0.11 [-0.20;-0.01] |
| Hyperglycemia                    | -0.07 [-0.16;0.02]  | n/a                 | -0.06 [-0.15;0.03]  | -0.04 [-0.12;0.05]  |
| ≤25 dB (Normal)                  | n/a                 | ref                 | ref                 | ref                 |
| >25 dB (Mild or more)            | n/a                 | -0.13 [-0.20;-0.07] | -0.13 [-0.19;-0.06] | -0.10 [-0.17;-0.04] |
| Intercept                        | -0.21 [-0.42;0.01]  | -0.22 [-0.43;-0.01] | -0.29 [-0.50;-0.07] | -0.38 [-0.60;-0.17] |
| <b>Digit Symbol Substitution</b> |                     |                     |                     |                     |
| Typical                          | ref                 | n/a                 | ref                 | ref                 |
| High CVDR                        | -0.07 [-0.15;0.00]  | n/a                 | -0.07 [-0.15;0.00]  | -0.04 [-0.11;0.03]  |
| Hyperglycemia                    | -0.07 [-0.15;0.00]  | n/a                 | -0.07 [-0.14;0.01]  | -0.04 [-0.11;0.04]  |

HEARING, CARDIOVASCULAR RISK, AND COGNITION

|                                                                                                                                                                                                                                 |                     |                     |                     |                     |
|---------------------------------------------------------------------------------------------------------------------------------------------------------------------------------------------------------------------------------|---------------------|---------------------|---------------------|---------------------|
| ≤25 dB (Normal)                                                                                                                                                                                                                 | n/a                 | ref                 | ref                 | ref                 |
| >25 dB (Mild or more)                                                                                                                                                                                                           | n/a                 | -0.06 [-0.12;-0.00] | -0.06 [-0.11;0.00]  | -0.04 [-0.09;0.02]  |
| Intercept                                                                                                                                                                                                                       | 1.26 [1.08;1.45]    | 1.25 [1.08;1.43]    | 1.22 [1.04;1.41]    | 1.00 [0.83;1.17]    |
| <b>Global Cognition</b>                                                                                                                                                                                                         |                     |                     |                     |                     |
| Typical                                                                                                                                                                                                                         | ref                 | n/a                 | ref                 | ref                 |
| High CVDR                                                                                                                                                                                                                       | -0.13 [-0.19;-0.06] | n/a                 | -0.12 [-0.19;-0.06] | -0.09 [-0.16;-0.03] |
| Hyperglycemia                                                                                                                                                                                                                   | -0.05 [-0.11;0.02]  | n/a                 | -0.04 [-0.10;0.03]  | -0.01 [-0.07;0.05]  |
| ≤25 dB (Normal)                                                                                                                                                                                                                 | n/a                 | ref                 | ref                 | ref                 |
| >25 dB (Mild or more)                                                                                                                                                                                                           | n/a                 | -0.11 [-0.16;-0.07] | -0.11 [-0.15;-0.06] | -0.08 [-0.13;-0.04] |
| Intercept                                                                                                                                                                                                                       | 0.78 [0.65;0.92]    | 0.78 [0.65;0.91]    | 0.72 [0.58;0.86]    | 0.67 [0.55;0.80]    |
| <sup>a</sup> Abbreviations: B = Coefficient estimate; CI = Confidence Interval; ref = Reference category; n/a = not applicable; B-SEVLT = Brief-Spanish English Verbal Learning Test; dB = decibels; CVDR = Cardiovascular risk |                     |                     |                     |                     |
| <sup>b</sup> M1, M2, and M3 are age, sex, education, and Field Center adjusted. M4 include additional adjustment for Hispanic/Latino Background, Income, Marital Status and CESD-10.                                            |                     |                     |                     |                     |

## HEARING, CARDIOVASCULAR RISK, AND COGNITION

| <b>eTable 14.</b> Tests for significance of the modifications in the effects of hearing impairment by three group cardiovascular risk classification. <sup>a</sup> |          |           |
|--------------------------------------------------------------------------------------------------------------------------------------------------------------------|----------|-----------|
| <b>Cognitive Test</b>                                                                                                                                              | <b>F</b> | <b>df</b> |
| B-SEVLT-Sum                                                                                                                                                        | 4.539    | 2         |
| B-SEVLT-Recall                                                                                                                                                     | 3.537    | 2         |
| Word Fluency                                                                                                                                                       | 0.609    | 2         |
| Digit Symbol Substitution                                                                                                                                          | 0.374    | 2         |
| Global Cognition                                                                                                                                                   | 2.175    | 2         |

<sup>a</sup> Abbreviations: B-SEVLT = Brief–Spanish English Verbal Learning Test; df = Degree of freedom

# HEARING, CARDIOVASCULAR RISK, AND COGNITION

**eFigure 1.** Risk profiles of latent cardiovascular risk classes (3-class solution) derived from the latent profile analyses.

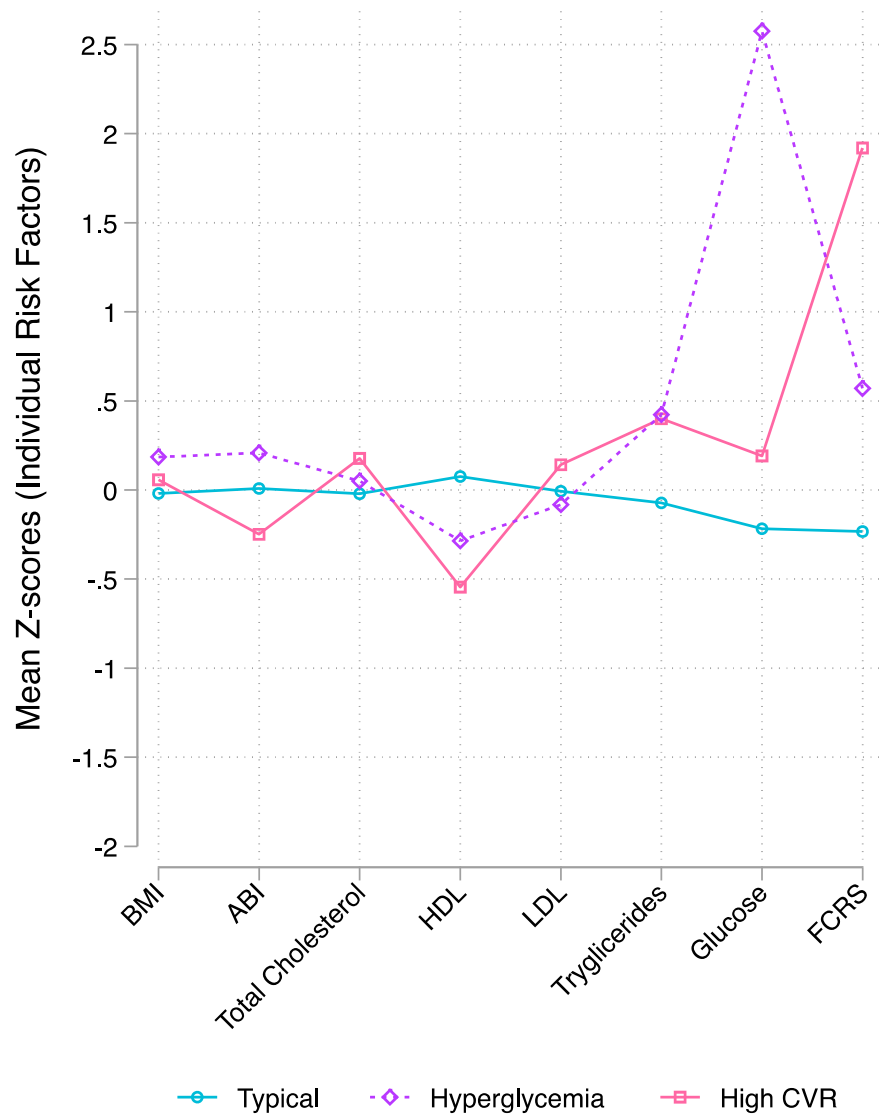

**eFigure 1. Legend:**

Abbreviations: BMI = Body mass index; ABI = Ankle-brachial index; HDL = High-density lipoproteins; LDL = Low-density lipoproteins; FCRS = Framingham Cardiovascular Risk Score; CVR = Cardiovascular Risk



# HEARING, CARDIOVASCULAR RISK, AND COGNITION

**eFigure 2.** Cognitive performance (z-score) by hearing impairment status.

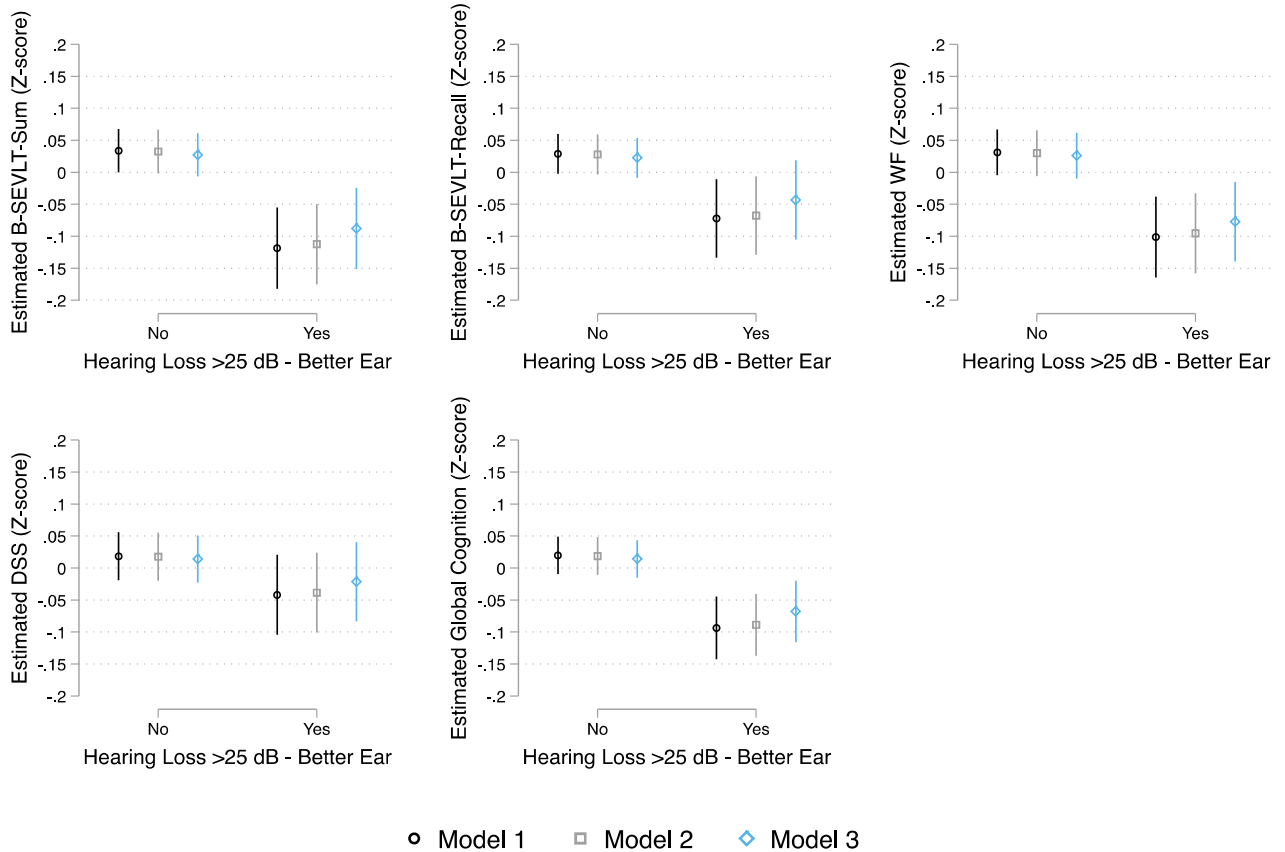

**eFigure 2. Legend:**

Abbreviations: B-SEVLT = Brief-Spanish English Verbal Learning Test; WF = Word Fluency; DSS = Digit Symbol Substitution.

Model1 adjusted for age, sex, education, and Field Center adjusted. Model 2 includes additional adjustment for cardiovascular risk classification (3-class solution). Model 3 includes additional adjustment for Hispanic/Latino background, income, marital status, and depressive symptoms.

# HEARING, CARDIOVASCULAR RISK, AND COGNITION

**eFigure 3.** Modification in cognitive performance (z-score) by hearing impairment status and cardiovascular risk classification (3-class solution).

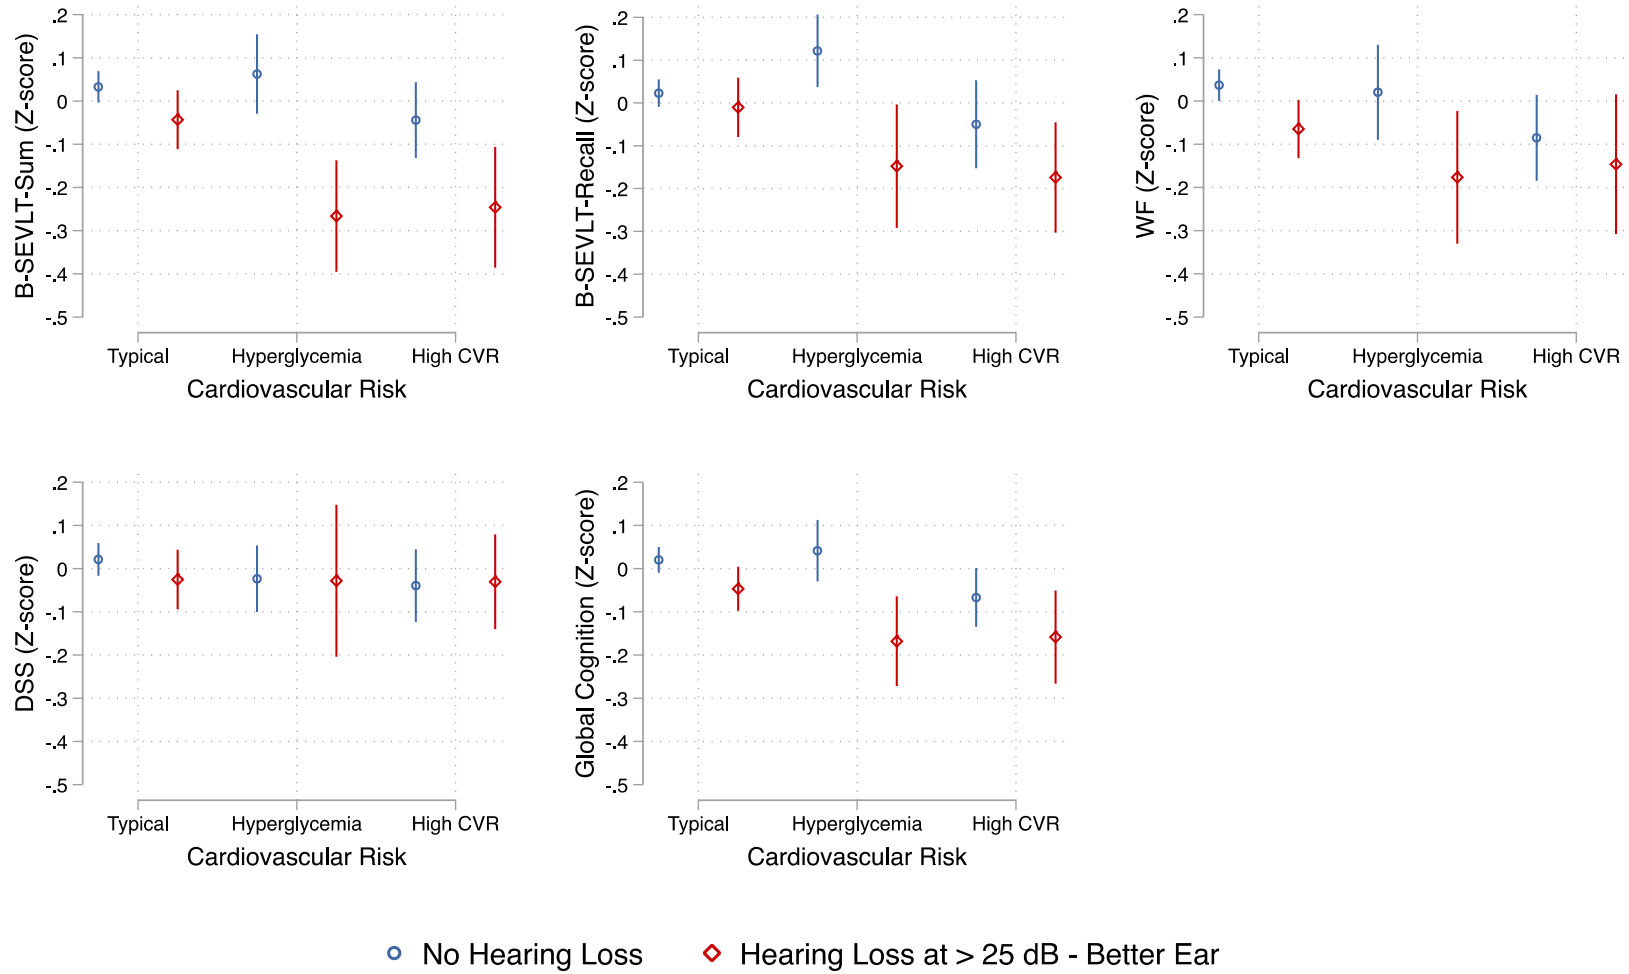

**eFigure 3. Legend:**

Abbreviations: B-SEVLT = Brief-Spanish English Verbal Learning Test; WF = Word Fluency; DSS = Digit Symbol Substitution. Models includes adjustment for age, sex, education, Field Center, Hispanic/Latino background, income, marital status, and depressive symptoms.

**REFERENCES**

1. Ferguson SL, G. Moore EW, Hull DM. Finding latent groups in observed data: A primer on latent profile analysis in Mplus for applied researchers. *International Journal of Behavioral Development*. 2019;44(5):458-468.
2. Oberski D. Mixture Models: Latent Profile and Latent Class Analysis. In: J. R, M. K, eds. *Modern Statistical Methods for HCI*. Springer, Cham.; 2016:275-287.
3. Masyn KE. Latent class analysis and finite mixture modeling. In: Little T, ed. *The Oxford handbook of quantitative methods*. New York, NY: Oxford University Press; 2013:551-611
